# Supplementary material
Source: PubMed Central journal article supplement (PMC5369671)
Supplement: PEDS_20162454SupplementaryData.pdf [file PEDS_20162454SupplementaryData.pdf]

## Supplemental Information

### SEARCH STRATEGY

Date of searches December 31, 2015.

Databases: PubMed, Embase, CINAHL, and Cochrane CENTRAL databases.

We also performed 2 searches in each database:

1. The first, focused strategy looks for any clinical trial (not necessarily randomized), cohort study (retrospective or prospective), case-control study, systematic review, or meta-analysis that specifically mentions juice in the title, abstract, or indexing and also discusses weight/BMI in children; and
2. The second, broader strategy looks specifically for randomized controlled trials (not other clinical trials), cohort studies, case-control studies, systematic reviews, or meta-analyses that are about eating/drinking habits and weight/BMI in children, but which do not mention the term "juice" in the title, abstract, or indexing. This second search strategy is designed to identify large studies of multiple aspects of eating and drinking habits, such as the 2011 *New England Journal of Medicine* article by Mozaffarian et al<sup>47</sup> that analyzes excess weight change in adults associated with many food and beverage types, including 100% fruit juice.

### PubMed

The second PubMed strategy in each set is designed to capture recent, unindexed references.

(1) Juice\* AND ("Beverages"[Mesh] OR "Food Habits"[Mesh] OR

"Diet"[Mesh] OR "Fruit"[mesh]) AND ("Body Weight"[Mesh] OR "Body Mass Index"[Mesh]) AND ("child"[MeSH] OR "adolescent"[mesh] OR "Infant"[Mesh]) AND ("Clinical Trials as Topic"[Mesh] OR "Cohort Studies"[mesh] OR "Controlled Before-After Studies"[mesh] OR "Case-Control Studies"[mesh] OR "Meta-Analysis as Topic"[mesh] OR "Clinical Trial"[Publication Type] OR "Multicenter Study"[Publication Type] OR "Meta-Analysis"[Publication Type] OR "systematic review" OR metaanalys\* OR meta analys\*) AND English[la]

= 84 references

(Juice\* AND ("body weight" OR "weight gain" OR "weight loss" OR "body mass" OR "weight status" OR overweight OR obesity OR obese OR bmi) AND (child OR children\* OR adolescen\* OR teen OR teens OR teenage\* OR preschool\* OR toddler\* OR girls OR boys OR pediatric\* OR pediatric\* OR "school aged" OR "elementary school" OR "grade school" OR "junior high" OR "middle school" OR "high school" OR childhood OR youth OR minors OR baby OR babies OR infant OR infants OR kid OR kids) AND ("clinical trial" OR "clinical trials" OR ((random\* OR cohort\* OR controlled OR control OR multicenter OR "multi center") AND (trial OR trials OR study OR studies)) OR metaanalys\* OR meta analys\* OR "systematic review") AND English[la] AND ("2014"[PDat]: "2016"[PDat])) NOT medline[sb]

= 11 references

(2) ("Diet"[Mesh:noexp] OR "Food Habits"[Mesh:noexp] OR "Beverages"[Mesh] OR "Fruit"[mesh]) AND ("Body

Weight"[Mesh] OR "Body Mass Index" [Mesh]) AND ("child"[MeSH] OR "adolescent"[mesh] OR "Infant"[Mesh]) AND ("Randomized Controlled Trial"[Publication Type] OR "Randomized Controlled Trials as Topic"[Mesh] OR "Cohort Studies"[Mesh] OR "Case-Control Studies"[mesh] OR "MetaAnalysis" [Publication Type] OR "Meta-Analysis as Topic"[Mesh] OR "systematic review" OR metaanalys\* OR meta analys\*) AND English[la]

= 2330 references

((diet OR dietary OR eating OR food OR foods OR beverage\* OR juice\* OR fruit OR fruits OR drink\*) AND ("body weight" OR "weight gain" OR "weight loss" OR "body mass" OR "weight status" OR overweight OR obesity OR obese OR bmi) AND (child OR children\* OR adolescen\* OR teen OR teens OR teenage\* OR preschool\* OR toddler\* OR girls OR boys OR pediatric\* OR pediatric\* OR "school aged" OR "elementary school" OR "grade school" OR "junior high" OR "middle school" OR "high school" OR childhood OR youth OR minors OR baby OR babies OR infant OR infants OR kid OR kids) AND (metaanalys\* OR meta analys\* OR "systematic review" OR ((random\* OR cohort\* OR "case control") AND (trial OR trials OR study OR studies)))) AND ("2014"[PDat]: "2016"[PDat])) NOT medline[sb]

= 666 references

### Embase

(1) Juice\* AND ('diet'/exp OR 'feeding behavior'/exp OR 'beverage'/exp OR 'fruit'/exp) AND ('body weight'/exp OR 'body mass'/exp) AND ('child'/exp OR

'adolescent'/exp) AND ('clinical trial'/exp OR 'clinical trial (topic)'/exp OR 'cohort analysis' OR 'case control study'/exp OR 'meta analysis' OR 'systematic review'/exp OR 'systematic review (topic)'/exp) AND [english]/lim = 45 references

(2) ('diet'/de OR 'feeding behavior'/de OR 'beverage'/exp OR 'fruit'/exp) AND ('body weight'/exp OR 'body mass'/exp) AND ('child'/exp OR 'adolescent'/exp) AND ('randomized controlled trial'/exp OR 'randomized controlled trial (topic)'/exp OR 'cohort analysis'/exp OR 'case control study'/exp OR 'meta analysis'/exp OR 'systematic review'/exp OR 'systematic review (topic)'/exp) AND [english]/lim = 1199 references

#### CTNAHL Plus

(1) 36 references

(MH "Fruit Juices+") OR (MH "Cranberry Juice") OR juice\*

AND

(MH "Diet+") OR (MH "Eating Behavior+") OR (MH "Drinking Behavior") OR (MH "Beverages+") OR (MH "Fruit+")

AND

(MH "Body Mass Index") OR (MH "Body Size") OR (MH "Body Surface Area") OR (MH "Body Weight+") OR (MH "Body Weight Changes+")

AND

(MH "Child+") OR (MH "Adolescence+")

AND

(MH "Clinical Trials+") OR (MH "Prospective Studies+") OR (MH

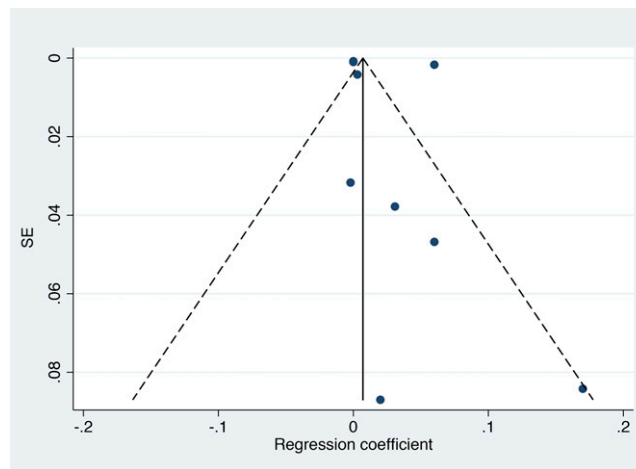

**SUPPLEMENTAL FIGURE 4**

Funnel plot with 95% CIs.

"Retrospective Design") OR (MH "Case Control Studies+") OR (MH "Randomized Controlled Trials") OR (MH "Meta Analysis") OR (MH "Systematic Review")

(2) 1192 references

(MH "Diet") OR (MH "Eating Behavior") OR (MH "Drinking Behavior") OR (MH "Beverages+") OR (MH "Fruit+")

AND

(MH "Body Mass Index") OR (MH "Body Size") OR (MH "Body Surface Area") OR (MH "Body Weight+") OR (MH "Body Weight Changes+")

AND

(MH "Child+") OR (MH "Adolescence+")

AND

(MH "Randomized Controlled Trials") OR (MH "Prospective Studies+") OR (MH "Retrospective Design") OR (MH "Case Control Studies+") OR (MH "Meta Analysis") OR (MH "Systematic Review")

#### Cochrane CENTRAL

(1) [mh beverages] or [mh "food habits"] or [mh diet] or [mh fruit] or feeding or eat or eating or beverage\* or fruit or fruits OR food OR foods OR drink OR drinks OR drinking or diet or dietary

(2) [mh "body weight"] or [mh "body mass index"] or "weight gain" or "weight loss" or overweight or obese or obesity or "body weight" or "body mass"

(3) Juice\*

(4) [mh child] OR [mh adolescent] OR child OR children\* OR adolescen\* OR teen OR teens OR teenage\* OR preschool\* OR toddler\* OR girls OR boys OR pediatric\* OR pediatric\* OR "school aged" OR "elementary school" OR "grade school" OR "junior high" OR "middle school" OR "high school" OR childhood OR youth OR minors OR baby OR babies OR infant OR infants OR kid OR kids #5: #1 AND #2 AND #3 AND #4

Trials (Cochrane Central Register of Controlled Trials): 62 references

**SUPPLEMENTAL TABLE 5** Risk of Bias Assessment of Included Prospective Cohort Studies

| Source                             | Selection                            |                                |                           | Cohort Comparability                           |                                  | Outcome          |                       |                  | Study Quality |              |
|------------------------------------|--------------------------------------|--------------------------------|---------------------------|------------------------------------------------|----------------------------------|------------------|-----------------------|------------------|---------------|--------------|
|                                    | Representativeness of Exposed Cohort | Selection of Nonexposed Cohort | Ascertainment of Exposure | Outcome of Interest Not Present at Study Start | Adjusted for Total Energy Intake | Adjusted for Age | Assessment of Outcome | Follow-up Length |               | Attrition    |
| Dong, 2015 <sup>34</sup>           | A*                                   | A*                             | C                         | Yes*                                           | No                               | Yes*             | B*                    | Yes*             | D             | Intermediate |
| Faith, 2006 <sup>20</sup>          | B*                                   | A*                             | C                         | Yes*                                           | No                               | Yes*             | B*                    | Yes*             | C             | Intermediate |
| Field, 2003 <sup>36</sup>          | B*                                   | A*                             | C                         | Yes*                                           | Yes*                             | Yes*             | C                     | Yes*             | B*            | High         |
| Libuda, 2008 <sup>35</sup>         | A*                                   | A*                             | B*                        | Yes*                                           | Yes*                             | Yes*             | B*                    | Yes*             | C             | High         |
| Newby, 2004 <sup>24</sup>          | C                                    | A*                             | C                         | Yes*                                           | Yes*                             | Yes*             | B*                    | No               | C             | Intermediate |
| Shefferly, 2015 <sup>1</sup>       | A*                                   | A*                             | B*                        | Yes*                                           | No                               | Yes*             | B*                    | Yes*             | C             | High         |
| Sonneville, 2015 <sup>12</sup>     | A*                                   | A*                             | C                         | Yes*                                           | Yes*                             | Yes*             | A*                    | Yes*             | C             | High         |
| Striegel-Moore, 2006 <sup>37</sup> | A*                                   | A*                             | B*                        | Yes*                                           | Yes*                             | Yes*             | B*                    | Yes*             | B*            | High         |

The risk of bias of cohort studies was evaluated by using the Newcastle-Ottawa Scale. The number of stars denotes the score. A study can be awarded a maximum of 1 star for each numbered item within the selection and outcome categories and a maximum of 2 stars for comparability with other cohort studies. There is no prespecified threshold quality score to distinguish between good and poor quality studies, but for purposes of our report, studies with a score >7 stars are considered good quality, those with a score of 5 to 6 are considered intermediate quality, and those with <5 stars are considered poor quality. Selection: representativeness of exposed cohort: A\*, truly representative of the average 100% fruit juice user; B\*, somewhat representative of the average 100% fruit juice user; C, selected group of participants not likely to be representative of the average 100% fruit juice user; D, no description of the derivation of the cohort. Selection of nonexposed cohort: A\*, drawn from the same community as the exposed cohort; B, drawn from a different source; no description of the derivation of the nonexposed cohort. Ascertainment of exposure: A\*, secure record; B\*, structured interview; C, written self-report; D, no description. Demonstration that outcome was not present at start of study: Yes\* (exclusion of baseline implausible energy intake, history of chronic diseases that may impact weight change); No. Cohort comparability: adjustment for total energy intake: Yes\*, study adjusts or controls for total energy intake; No, study does not adjust or control for total energy intake. Adjustment for age: Yes\*, study adjusts or controls for age, or does subgroup analysis by age; No, study does not adjust or controls for age, and/or no subgroup analysis by age. Outcome: assessment of outcome: A\*, independent blind assessment; B\*, record linkage; C, self-report; D, no description. Was follow-up long enough for outcomes to occur: Yes\*, duration of follow-up  $\geq 1$  year; No, duration of follow-up <1 year. Attrition: A\*, complete follow-up (all participants accounted for); B\*, participants lost to follow-up unlikely to introduce bias: number lost  $\leq 20\%$ , or description of those lost suggesting no different from those followed; C, follow-up rate <80% and no description of those lost; D, no statement.

**SUPPLEMENTAL TABLE 6** Citations of Studies Excluded After Full-Text Review ( $n = 28$ )

| Reason for Exclusion ( $n$ )                                                                                                                                                                     | Ref. |
|--------------------------------------------------------------------------------------------------------------------------------------------------------------------------------------------------|------|
| Exposure not 100% fruit juice (17)                                                                                                                                                               | 10   |
|                                                                                                                                                                                                  | 48   |
|                                                                                                                                                                                                  | 49   |
|                                                                                                                                                                                                  | 50   |
|                                                                                                                                                                                                  | 51   |
|                                                                                                                                                                                                  | 52   |
|                                                                                                                                                                                                  | 53   |
|                                                                                                                                                                                                  | 54   |
|                                                                                                                                                                                                  | 55   |
|                                                                                                                                                                                                  | 56   |
|                                                                                                                                                                                                  | 57   |
|                                                                                                                                                                                                  | 58   |
|                                                                                                                                                                                                  | 59   |
|                                                                                                                                                                                                  | 60   |
|                                                                                                                                                                                                  | 61   |
|                                                                                                                                                                                                  | 62   |
|                                                                                                                                                                                                  | 63   |
| Systematic review (5)                                                                                                                                                                            | 10   |
|                                                                                                                                                                                                  | 59   |
|                                                                                                                                                                                                  | 60   |
| Outcome not change in BMI or BMI z score (3)                                                                                                                                                     | 62   |
|                                                                                                                                                                                                  | 63   |
|                                                                                                                                                                                                  | 64   |
| Duplicate subjects in the Growing Up Today Study (1)<br>Could not confirm fruit juice was 100% fruit juice (1)<br>Abstract with incomplete reporting of outcome, not published as manuscript (1) | 65   |
|                                                                                                                                                                                                  | 33   |
|                                                                                                                                                                                                  | 31   |
|                                                                                                                                                                                                  | 32   |

## SUPPLEMENTAL REFERENCES

47. Mozaffarian D, Hao T, Rimm EB, Willett WC, Hu FB. Changes in diet and lifestyle and long-term weight gain in women and men. *N Engl J Med*. 2011;364(25):2392–2404
48. Ambrosini GL, Oddy WH, Huang RC, Mori TA, Beilin LJ, Jebb SA. Prospective associations between sugar-sweetened beverage intakes and cardiometabolic risk factors in adolescents. *Am J Clin Nutr*. 2013;98(2):327–334
49. Bigornia SJ, LaValley MP, Noel SE, Moore LL, Ness AR, Newby PK. Sugar-sweetened beverage consumption and central and total adiposity in older children: a prospective study accounting for dietary reporting errors. *Public Health Nutr*. 2015;18(7):1155–1163
50. Blum JW, Jacobsen DJ, Donnelly JE. Beverage consumption patterns in elementary school aged children across a two-year period. *J Am Coll Nutr*. 2005;24(2):93–98
51. Coppinger T, Jeanes Y, Mitchell M, Reeves S. Beverage consumption and BMI of British schoolchildren aged 9-13 years. *Public Health Nutr*. 2013;16(7):1244–1249
52. De Coen V, De Bourdeaudhuij I, Verbestel V, Maes L, Vereecken C. Risk factors for childhood overweight: a 30-month longitudinal study of 3- to 6-year-old children. *Public Health Nutr*. 2014;17(9):1993–2000
53. de Souza MC, Eisenmann JC, e Santos DV, de Chaves RN, de Moraes Forjaz CL, Maia JA. Modeling the dynamics of BMI changes during adolescence. The Oporto Growth, Health and Performance Study. *Int J Obes*. 2015;39(7):1063–1069
54. DeBoer MD, Scharf RJ, Demmer RT. Sugar-sweetened beverages and weight gain in 2- to 5-year-old children. *Pediatrics*. 2013;132(3):413–420
55. Diethelm K, Günther AL, Schulze MB, Standl M, Heinrich J, Buyken AE. Prospective relevance of dietary patterns at the beginning and during the course of primary school to the development of body composition. *Br J Nutr*. 2014;111(8):1488–1498
56. Durão C, Severo M, Oliveira A, et al. Evaluating the effect of energy-dense foods consumption on preschool children's body mass index: a prospective analysis from 2 to 4 years of age. *Eur J Nutr*. 2015;54(5):835–843
57. Fiorito LM, Marini M, Francis LA, Smiciklas-Wright H, Birch LL. Beverage intake of girls at age 5 y predicts adiposity and weight status in childhood and adolescence. *Am J Clin Nutr*. 2009;90(4):935–942
58. Haerens L, Vereecken C, Maes L, De Bourdeaudhuij I. Relationship of physical activity and dietary habits with body mass index in the transition from childhood to adolescence: a 4-year longitudinal study. *Public Health Nutr*. 2010;13(10A):1722–1728
59. Hyson DA. A review and critical analysis of the scientific literature related to 100% fruit juice and human health. *Adv Nutr*. 2015;6(1):37–51
60. Janssen I, Katzmarzyk PT, Boyce WF, et al; Health Behaviour in School-Aged Children Obesity Working Group. Comparison of overweight and obesity prevalence in school-aged youth from 34 countries and their relationships with physical activity and dietary patterns. *Obes Rev*. 2005;6(2):123–132
61. Jensen BW, Nichols M, Allender S, et al. Inconsistent associations between sweet drink intake and 2-year change in BMI among Victorian children and adolescents. *Pediatr Obes*. 2013;8(4):271–283
62. Ledoux TA, Hingle MD, Baranowski T. Relationship of fruit and vegetable intake with adiposity: a systematic review. *Obes Rev*. 2011;12(5):e143–e150
63. Alinia S, Hels O, Tetens, I. The potential association between fruit intake and body weight—a review. *Obes Res*. 2009;10(6):639–647
64. Skinner JD, Carruth BR. A longitudinal study of children's juice intake and growth: the juice controversy revisited. *J Am Diet Assoc*. 2001;101(4):432–437
65. Skinner JD, Carruth BR, Moran J III, Houck K, Coletta F. Fruit juice intake is not related to children's growth. *Pediatrics*. 1999;103(1):58–64
66. Jensen BW, Nielsen BM, Husby I, et al Association between sweet drink intake and adiposity in Danish children participating in a long-term intervention study. *Pediatr Obes*. 2013; 8(4):259–270
67. Kral TV, Stunkard AJ, Berkowitz RI, Stallings VA, Moore RH, Faith MS. Beverage consumption patterns of children born at different risk of obesity. *Obesity (Silver Spring)*. 2008;16(8):1802–1808
68. Kuhl ES, Clifford LM, Bandstra NF, et al. Examination of the association between lifestyle behavior changes and weight outcomes in preschoolers receiving treatment for obesity. *Health Psychol*. 2014;33(1):95–98
69. Laska MN, Murray DM, Lytle LA, Harnack LJ. Longitudinal associations between key dietary behaviors and weight gain over time: transitions through the adolescent years. *Obesity (Silver Spring)*. 2012;20(1):118–125
70. Mallan KM, Fildes A, Magarey AM, Daniels LA. The relationship between number of fruits, vegetables, and noncore foods tried at age 14 months and food preferences, dietary intake patterns, fussy eating behavior, and weight status at age 3.7 years. *J Acad Nutr Diet*. 2016;116(4):630–637
71. Tam CS, Garnett SP, Cowell CT, Campbell K, Cabrera G, Baur LA. Soft drink consumption and excess weight gain in Australian school students: results from the Nepean study. *Int J Obes*. 2006;30(7):1091–1093
